# Supplementary material
Source: PubMed Central journal article supplement (PMC3407577)
Supplement: NIHMS383021-supplement-1_si_001.pdf [file NIHMS383021-supplement-1_si_001.pdf]

## Supporting Information

*for*

Assembly of Aptamer Switch Probes and  
Photosensitizer on Gold Nanorods for Targeted  
Photothermal and Photodynamic Cancer Therapy

Assembly of Aptamer Switch Probes and  
Photosensitizer on Gold Nanorods for Targeted  
Photothermal and Photodynamic Cancer Therapy

*Jian Wang,<sup>†,‡</sup> Guizhi Zhu,<sup>†,#</sup> Mingxu You,<sup>†</sup> Erqun Song,<sup>†,‡</sup> Mohammed Ibrahim Shukoor,<sup>†</sup> Kejing  
Zhang,<sup>†</sup> Meghan B. Altman,<sup>†</sup> Yan Chen,<sup>†,#</sup> Zhi Zhu,<sup>†,#</sup> Cheng Zhi Huang<sup>‡,\*</sup> and Weihong<sup>†,#,\*</sup>*

<sup>†</sup>Department of Chemistry and Department of Physiology and Functional Genomics, Shands Cancer Center and Center for Research at the Interface of Bio/Nano, UF Genetics Institute and McKnight Brain Institute, University of Florida, Gainesville, FL 32611-7200, United States; <sup>‡</sup>College of Chemistry and Chemical Engineering, College of Pharmaceutical Science, MOE Key Laboratory on Luminescence and Real-Time Analysis, Southwest University, Chongqing 400715, PR China; <sup>#</sup>Molecular Science and Biomedicine Laboratory, State Key Laboratory of Chemo/Bio-Sensing and Chemometrics, College of Biology and College of Chemistry and Chemical Engineering, College of Biology, Hunan University, Changsha, 410082, P. R. China

**TABLE S1 Sequences summary**

| Name                                           | Sequences                                                                                                                               |
|------------------------------------------------|-----------------------------------------------------------------------------------------------------------------------------------------|
| Lib                                            | 5'-SH-ATC CAG AGT GAC GCA GCA NNN NNN NNN NNN NNN NNN NNN NNN<br>NNN NNN NNN NNN NNN NNN NNN NNN NNN TGG ACA CGG TGG CTT AGT-<br>FAM-3' |
| Sgc8                                           | <b>5'-SH-A TCT AAC TGC TGC GCC GCC GGG AAA ATA CTG TAC GGT TAG<br/>A-FAM-3'</b>                                                         |
| ASP-T <sub>n</sub> (n=0, 8,<br>16, 24, 32, 40) | 5'-SH-CTA ACC GTT <sub>n</sub> ATC TAA CTG CTG CGC CGC CGG GAA AAT ACT GTA<br>CGG TTA GA-FAM-3'                                         |
| ASP-T <sub>32</sub> -Ce6                       | 5'-SH-CTA ACC GTT TTT TAT CTA<br>ACT GCT GCG CCG CCG GGA AAA TAC TGT ACG GTT AGA-Ce6-3'             |
| <i>cASP-T<sub>32</sub></i>                     | <i>5'-TCT AAC CGT ACA GTA TTT TCC CGG CGG CGC AGC AGT TAG ATA AAA<br/>AAA AAA AAA AAA AAA AAA AAA AAA AAA AAC GGT TAG-3'</i>            |

N represents A, T, C or G base.

Ce6

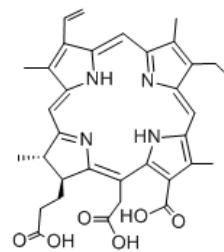

**Figure S1** The chemical structure of Ce6

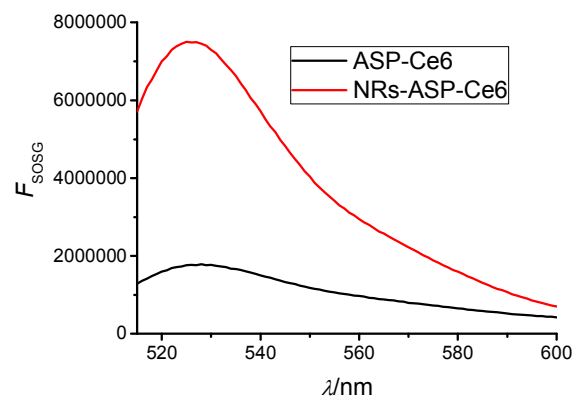

**Figure S2** Fluorescence of SOSG for Ce6-labeled ASP and ASP-NR conjugates.

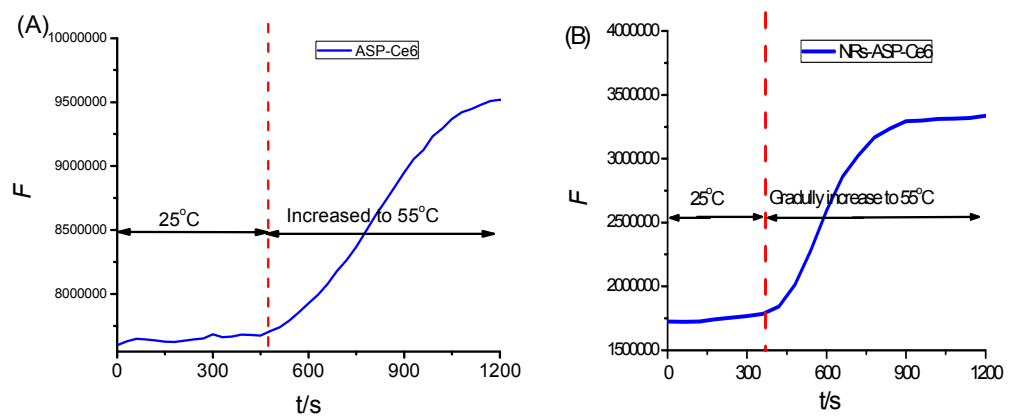

**Figure S3** The fluorescence change with increasing temperature.

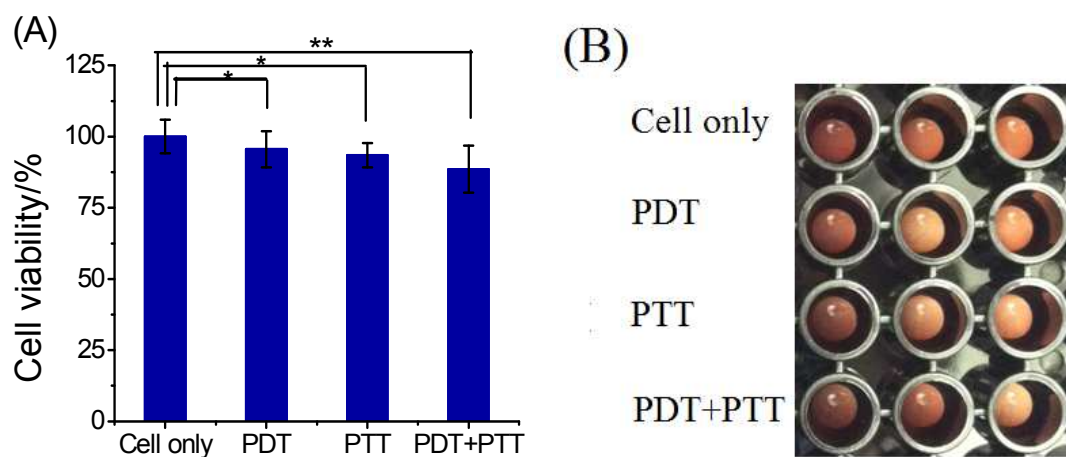

**Figure S4.** Cell viability data (A) and imaging (B) of Ramos cells incubated with Ce6-ASP-T<sub>32</sub>-NRs without light irradiation (cells only), under white light irradiation (PDT), under laser irradiation (PTT), and combined PDT+PTT, respectively. Cells, 200k/sample; probes, 0.2nM. P values were calculated by the Student's *t*-test: \**p*<0.05, \*\**p*<0.001, \*\*\**p* < 0.0001, *n*=3.
